# Supplementary material for: A novel regional irrigation water productivity model coupling irrigation- and drainage-driven soil hydrology and salinity dynamics and shallow groundwater movement in arid regions in China
Source: Copernicus journal article supplement (doi:10.5194/hess-24-2399-2020), 2020-05-12
Supplement: Supplementary file 1 [file hess-24-2399-2020-supplement.pdf]

Supplement of Hydrol. Earth Syst. Sci., 24, 2399–2418, 2020  
<https://doi.org/10.5194/hess-24-2399-2020-supplement>  
© Author(s) 2020. This work is distributed under  
the Creative Commons Attribution 4.0 License.

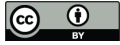

*Supplement of*

**A novel regional irrigation water productivity model coupling  
irrigation- and drainage-driven soil hydrology and salinity dynamics  
and shallow groundwater movement in arid regions in China**

**Jingyuan Xue et al.**

*Correspondence to:* Zailin Huo (huozl@cau.edu.cn)

The copyright of individual parts of the supplement might differ from the CC BY 4.0 License.

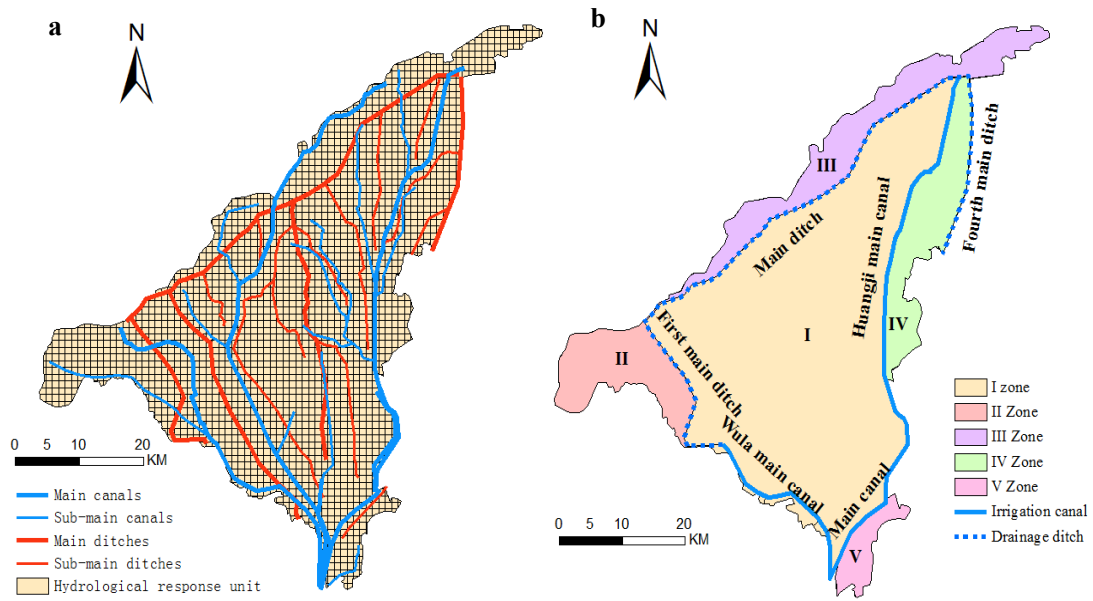

**Fig.S1.** The representation of (a) regional HRUs division and (b) groundwater boundary condition division.

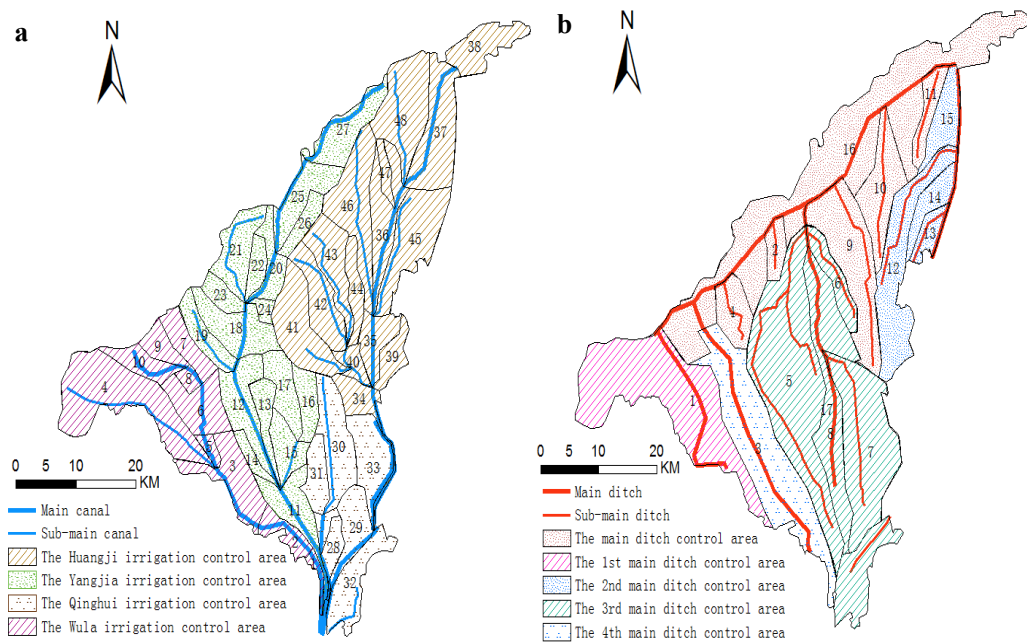

**Fig.S2.** Spatial distribution and their control zones of main and sub-main (a) canals and (b) drainage ditches.

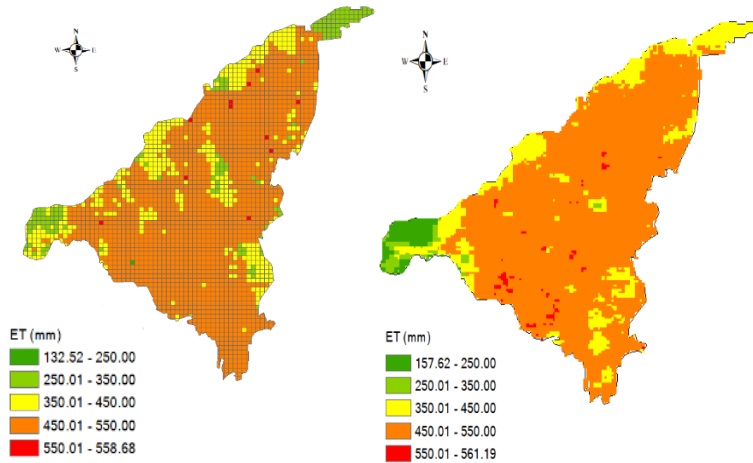

a- Simulated ET (2006)

b- Remote sensing ET (2006)

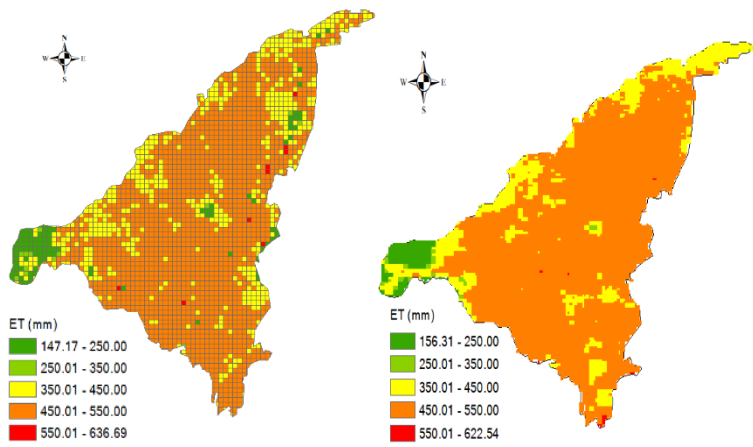

c- Simulated ET (2007)

d- Remote sensing ET (2007)

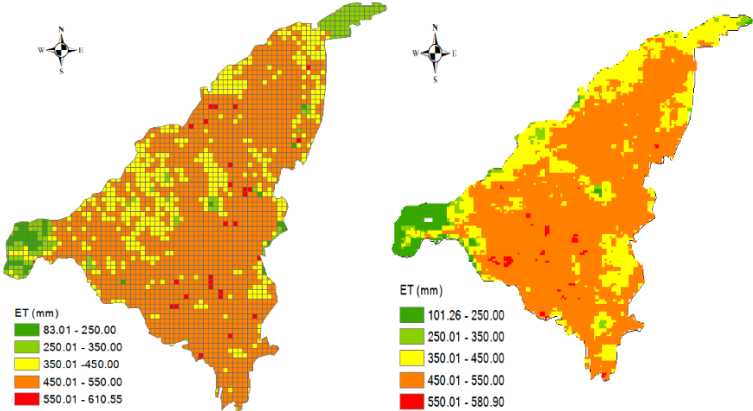

e- Simulated ET (2008)

f- Remote sensing ET (2008)

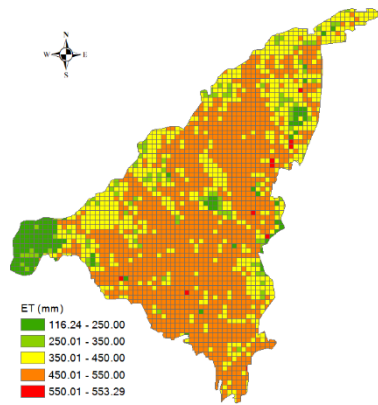

g- Simulated ET (2009)

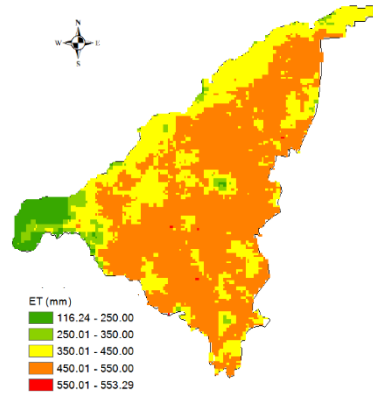

h- Remote sensing ET (2009)

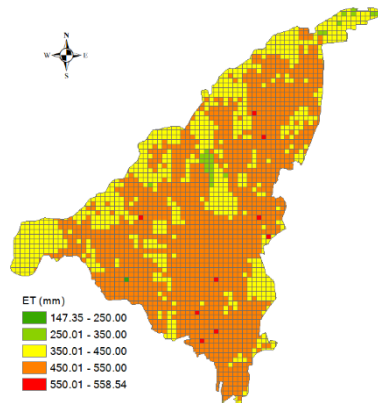

i- Simulated ET (2010)

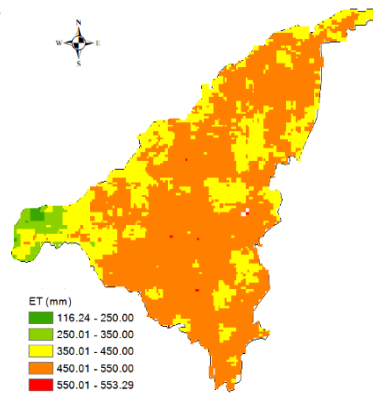

j- Remote sensing ET (2010)

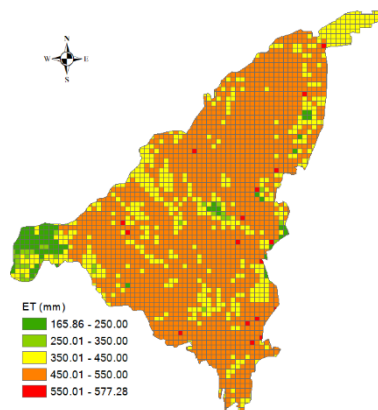

k- Simulated ET (2011)

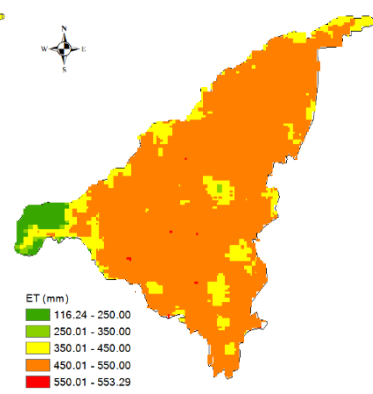

l-Remote sensing ET (2011)

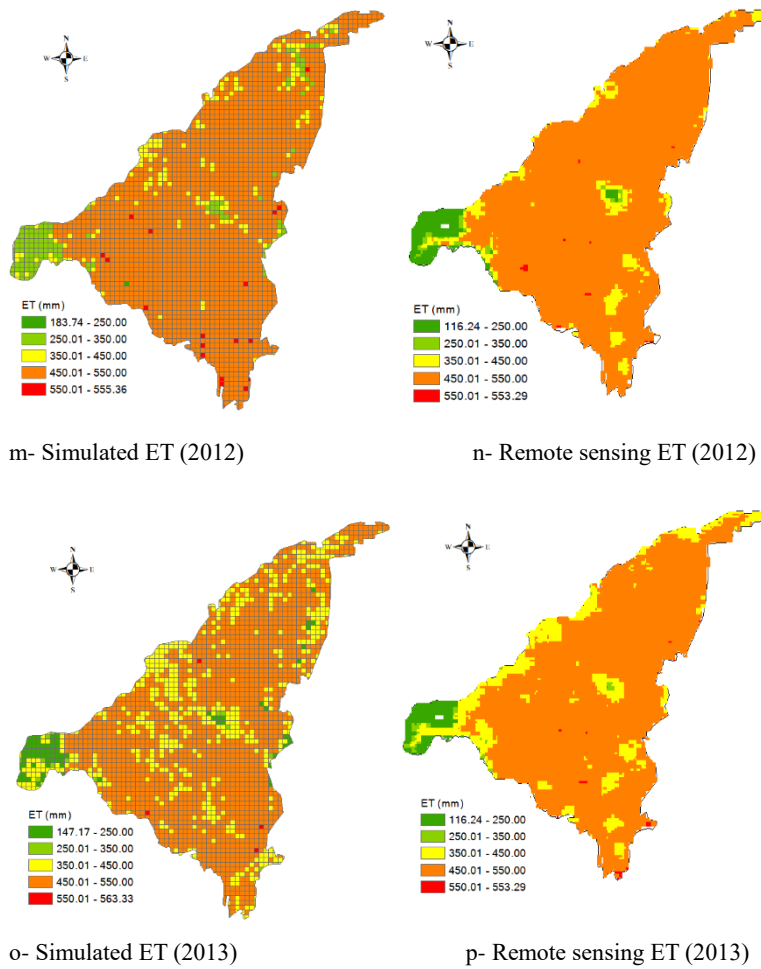

**Fig.S3.** Comparison of the simulated and remote sensing cumulative ET during the crop growing season in the years of 2006-2013.
